# Supplementary material
Source: PubMed Central journal article supplement (PMC3196859)
Supplement: supp_124.20.3484_JCS088500FigS2.pdf [file supp_124.20.3484_JCS088500FigS2.pdf]

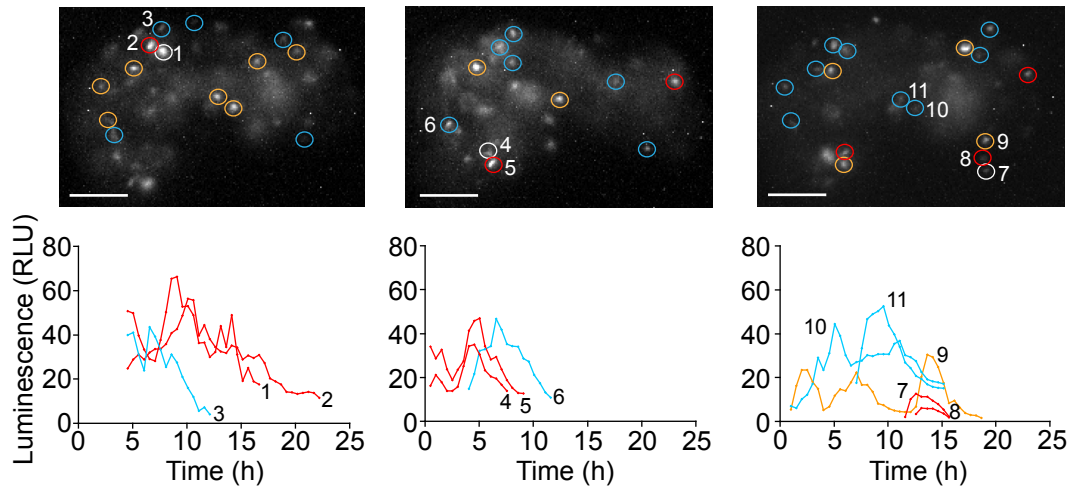

**Fig. S2. Lactotroph cells display local co-ordination of transcription activity in E16.5 pituitary tissue**

Examples of adjacent cells that have similar transcription activity. Images show the position of cells with highly similar transcription profiles (circled in red), cells with similar transcription profiles (circled in orange) and cells with dissimilar transcription profiles (circled in blue) to a reference cell (circled in white). Cells of interest in the image are numbered and their luminescence activity depicted in the graph below.

Scale bar: 100  $\mu\text{m}$ .
